# Supplementary material
Source: MDPI journal article supplement (https://www.mdpi.com/2571-6131/6/4/123)
Supplement: s1 [file s1]

Archive with 3 entries (3 files):
- ceramics-2541086-Figure S1.pdf
- ceramics-2541086-Figure S2.pdf
- ceramics-2541086-Table S1.pdf
