# Supplementary material
Source: MDPI journal article supplement (https://www.mdpi.com/2571-6131/6/4/123)
Supplement: s1 [file s1]

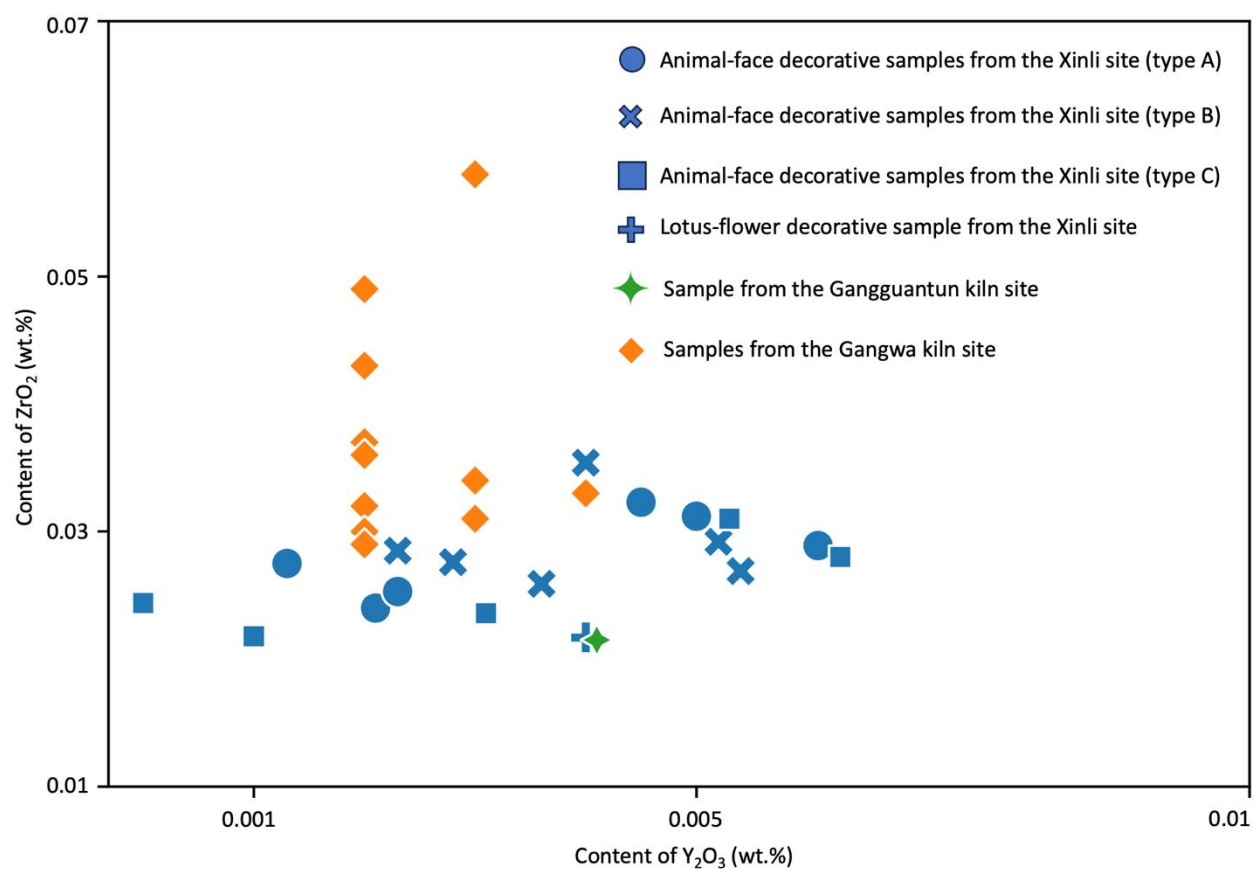

**Figure S2.** Scatterplots of the  $\text{Y}_2\text{O}_3$  and  $\text{ZrO}_2$  contents of the tile bodies from different kiln sites of the Liao dynasty. Each dot represents a tile body sample.
