# Supplementary material
Source: MDPI journal article supplement (https://www.mdpi.com/2571-6131/6/4/123)
Supplement: s1 [file s1]

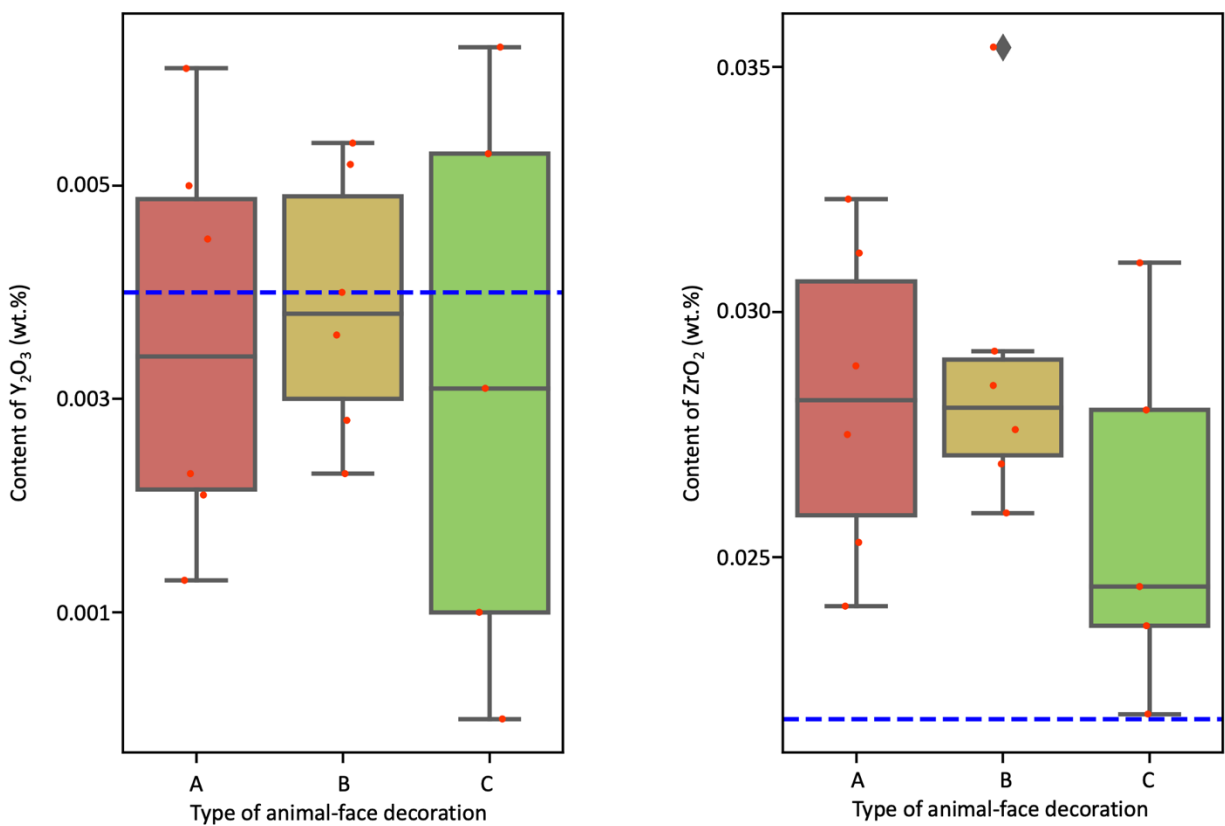

**Figure S1.** Plots of  $Y_2O_3$  and  $ZrO_2$  contents in the body samples from the Xinli with different types of decoration. Dashed lines represent the corresponding element content of the lotus-flower decorated sample from the Xinli site.
