# Supplementary material
Source: MDPI journal article supplement (https://www.mdpi.com/2571-6131/6/4/123)
Supplement: s1 [file s1 › ceramics-2541086-Table S1.pdf]

**Table S1.** Major and trace elements of the sample tile body from  
Gangguantun kiln site, Liaoning province (wt.%)

| Sample<br>No. | SiO <sub>2</sub> | Al <sub>2</sub> O <sub>3</sub> | Na <sub>2</sub> O | MgO  | K <sub>2</sub> O | CaO  | TiO <sub>2</sub> | Fe <sub>2</sub> O | Rb <sub>2</sub> O       | SrO                     | Y <sub>2</sub> O <sub>3</sub> | ZrO <sub>2</sub>        |
|---------------|------------------|--------------------------------|-------------------|------|------------------|------|------------------|-------------------|-------------------------|-------------------------|-------------------------------|-------------------------|
| 1             | 64.69            | 25.77                          | 0.83              | 0.66 | 1.40             | 0.44 | 1.02             | 4.17              | 6.20 × 10 <sup>-3</sup> | 1.10 × 10 <sup>-2</sup> | 4.10 × 10 <sup>-3</sup>       | 2.20 × 10 <sup>-2</sup> |
